# Supplementary material for: Smad7 Controls Immunoregulatory PDL2/1-PD1 Signaling in Intestinal Inflammation and Autoimmunity
Source: PubMed Central journal article supplement — Cell Rep. Author manuscript; Available in PMC 2019 Dec 21. (PMC6925592; doi:10.1016/j.celrep.2019.07.065), 2019-09-24
Supplement: NIHMS1543789-supplement-1.pdf [file NIHMS1543789-supplement-1.pdf]

**Cell Reports, Volume 28**

**Supplemental Information**

**Smad7 Controls Immunoregulatory PDL2/1-PD1**

**Signaling in Intestinal Inflammation**

**and Autoimmunity**

**Lucien P. Garo, Amrendra K. Ajay, Mai Fujiwara, Vanessa Beynon, Chantal Kuhn, Galina Gabriely, Supriya Sadhukan, Radhika Raheja, Stephen Rubino, Howard L. Weiner, and Gopal Murugaiyan**

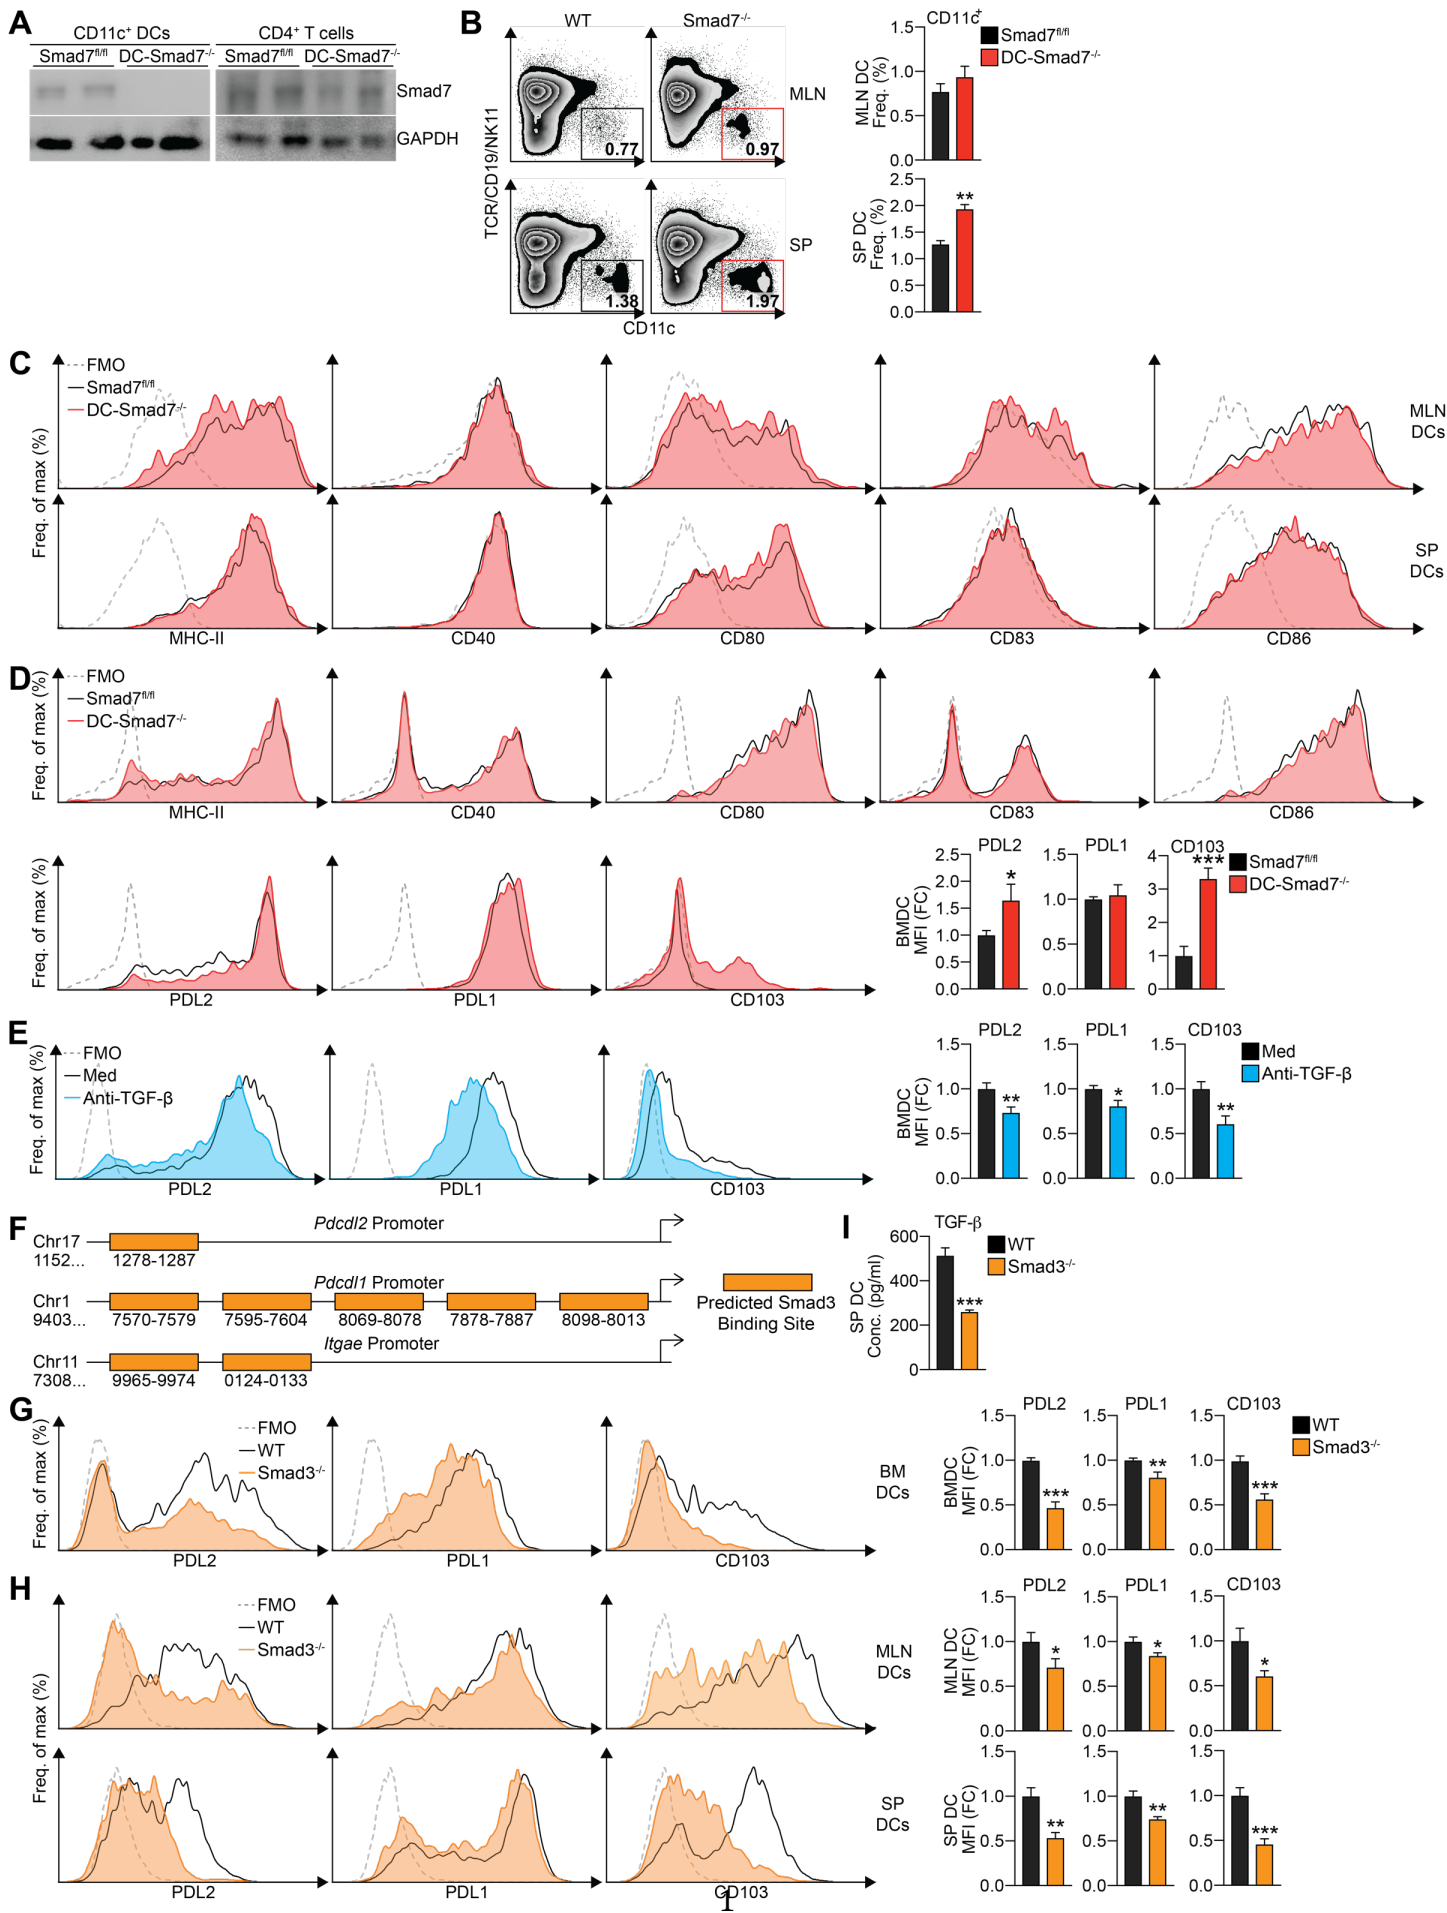

**Figure S1. Smad7<sup>-/-</sup> DCs present with a tolerogenic phenotype, in contrast to Smad3<sup>-/-</sup> DCs. Related to Figure 1. (A)** Western blot of Smad7 in splenic CD11c<sup>+</sup> DCs (**left**) and CD4<sup>+</sup> T cells (**right**) isolated *ex vivo* from naïve Smad7<sup>fl/fl</sup> and DC-Smad7<sup>-/-</sup> mice. **(B)** Representative FACS plots (**left**) and frequencies (**right**) of CD11c<sup>+</sup> DCs in the spleens and MLNs isolated *ex vivo* from naïve Smad7<sup>fl/fl</sup> and DC-Smad7<sup>-/-</sup> mice (n=6). **(C)** Representative FACS histograms of MHC-II, CD40, CD80, CD83, and CD86 in MLN (**top**) and splenic (**bottom**) DCs from these mice (n=11). **(D)** Representative FACS histograms of MHC-II, CD40, CD80, CD83, CD86, PDL2, PDL1, and CD103 (**top**), and FACS histograms and MFIs of PDL2, PDL1, and CD103 (**bottom**), in BMDCs differentiated from Smad7<sup>fl/fl</sup> and DC-Smad7<sup>-/-</sup> mice (n=6). **(E)** Representative FACS histograms (**left**) and MFIs (**right**) of PDL2, PDL1, and CD103 in BMDCs differentiated with or without TGF- $\beta$ -neutralizing antibody (20  $\mu$ g/mL) (n=12). **(F)** Schematic localization of putative Smad3 binding sites on *Pdcd12* (PDL2), *Pdcd11* (PDL1), and *Itgae* promoter regions from Alggen, a web-based algorithm for TFBS predictions. **(G)** Representative FACS histograms (**left**) and MFIs (**right**) of PDL2, PDL1, and CD103 in BMDCs differentiated from WT and Smad3<sup>-/-</sup> mice (n=11). **(H)** Representative FACS histograms (**left**) and MFIs (**right**) of PDL2, PDL1, and CD103 in MLN (**top**) and splenic (**bottom**) CD11c<sup>+</sup> DCs from naïve Smad7<sup>fl/fl</sup> and DC-Smad7<sup>-/-</sup> mice (n=6). **(I)** ELISA quantification of secreted TGF- $\beta$  by MLN DCs from these mice (n=4). MFI data reflective of CD11c<sup>+</sup> population and expressed as fold change (FC) from **(D)** Smad7<sup>fl/fl</sup> condition, **(E)** media condition, or **(G-H)** WT condition. Data representative of  $\geq 3$  independent experiments. Mean  $\pm$  SEM. \*p<.05, \*\*p<.01, \*\*\*p<.001, by unpaired T test.

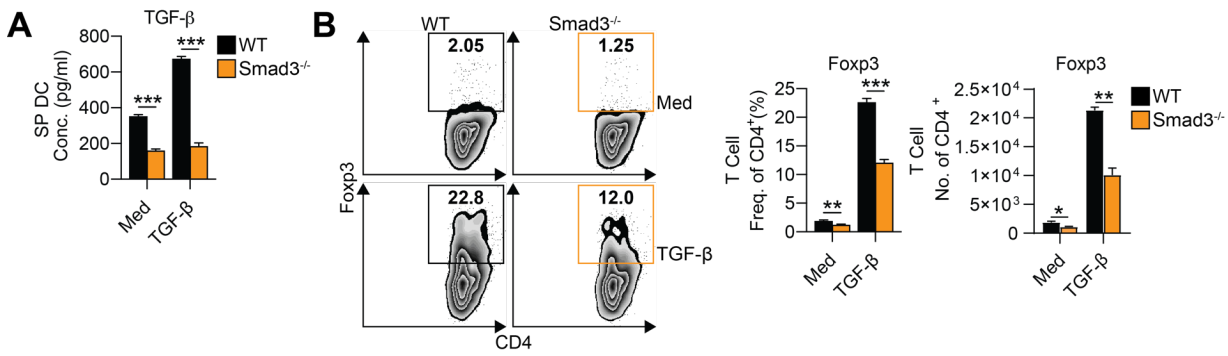

**Figure S2. Smad3 promotes DC responsiveness to TGF- $\beta$  and their ability to induce Tregs. Related to Figure 2. (A)** ELISA quantification of secreted TGF- $\beta$  from splenic WT and Smad3<sup>-/-</sup> CD11c<sup>+</sup> DCs stimulated with or without TGF- $\beta$  (0.5 ng/mL) for 12h, washed and cultured for another 48 h (n=6). **(B)** Representative FACS plots (**left**), frequencies (**middle**), and cell count per well (**right**) of Foxp3-GFP<sup>+</sup> populations in naïve CD4<sup>+</sup> Foxp3-GFP T cells co-cultured with splenic CD11c<sup>+</sup> DCs from Smad7<sup>fl/fl</sup> or DC-Smad3<sup>-/-</sup> mice at a 1:3 DC:T cell ratio, with or without TGF- $\beta$  (0.5 ng/mL), for 4 d (n=4). Data representative of  $\geq 3$  independent experiments. Mean  $\pm$  SEM. \*p<.05, \*\*p<.01, \*\*\*p<.001, by unpaired T test.

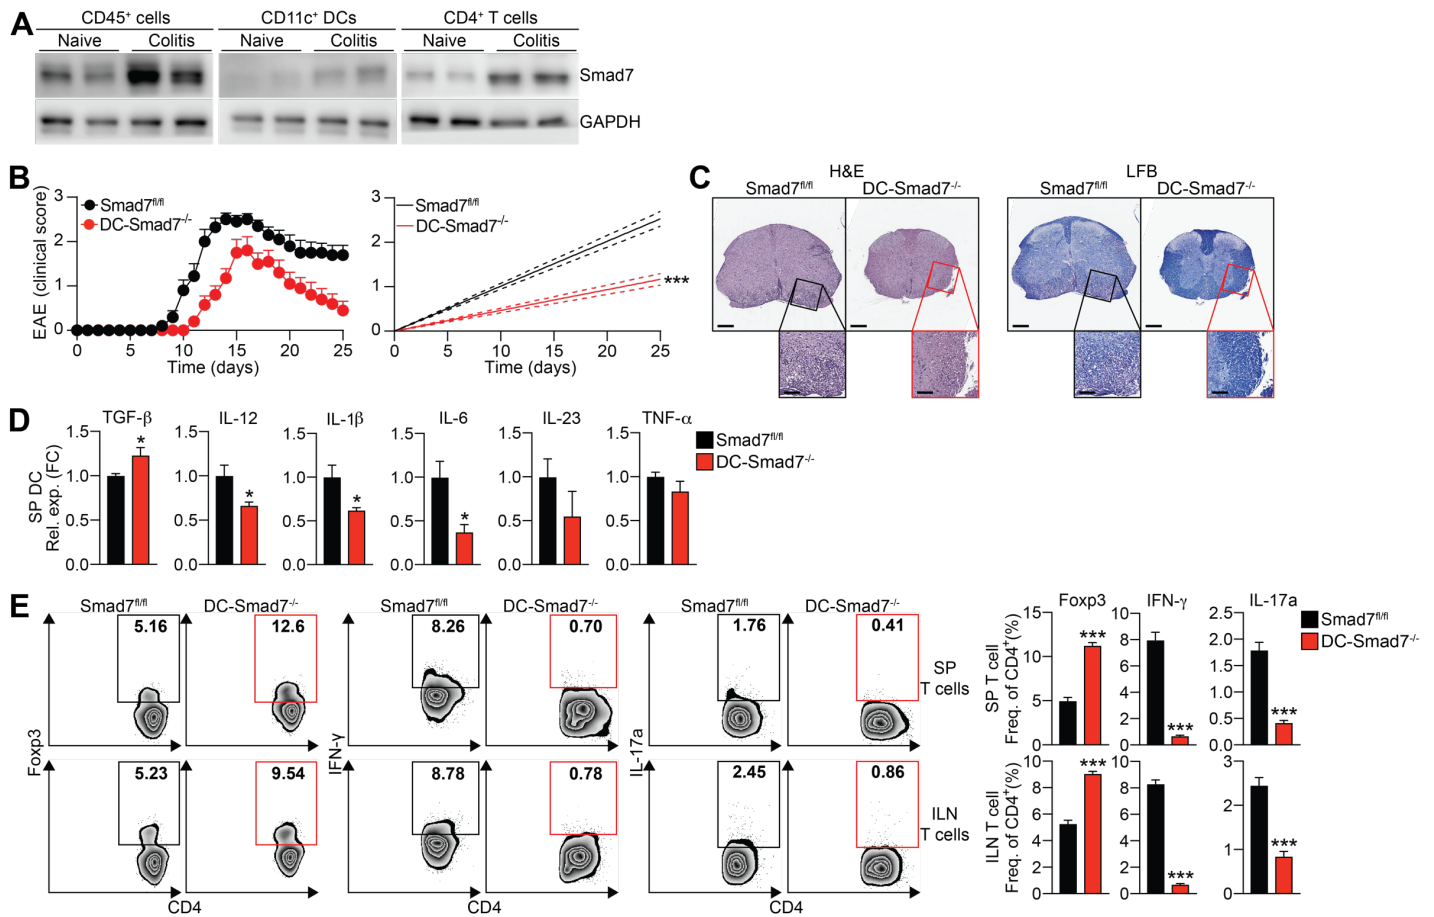

**Figure S3. Smad7 is increased during colitis, and Smad7-deficiency in DCs mitigates EAE. Related to Figure 3.** (A) Western blot of Smad7 in MLN CD45<sup>+</sup> cells (left), CD11c<sup>+</sup> DCs (middle), and CD4<sup>+</sup> T cells (right) isolated *ex vivo* from naïve and colitic WT mice after 7 days of 3% DSS in drinking water. (B) Clinical EAE scores (left) and linear regression analysis (right) of Smad7<sup>fl/fl</sup> and DC-Smad7<sup>-/-</sup> mice immunized with MOG/CFA (n=10). (C) Representative histopathological sections of spinal cords stained with H & E (left) showing inflammatory infiltrates and Luxol Fast Blue (LFB) (right) showing demyelination of these mice at peak disease. Scale bars represent ~250µm (top) and ~100µm (bottom). (D) qRT-PCR of TGF-β, IL-12, IL-1β, IL-6, IL-23, and TNF-α of splenic DCs in these mice at disease onset (n=3-5). Data expressed as fold change from Smad7<sup>fl/fl</sup> media condition. (E) Representative FACS plots (left) and frequencies (right) of Foxp3<sup>+</sup>, IFN-γ<sup>+</sup>, and IL-17a<sup>+</sup> populations in splenic (top) and draining inguinal lymph node (bottom) at disease onset (n=10). Data representative of ≥ 3 independent experiments. Mean ± SEM. \*p<.05, \*\*\*p<.001 by unpaired T test.

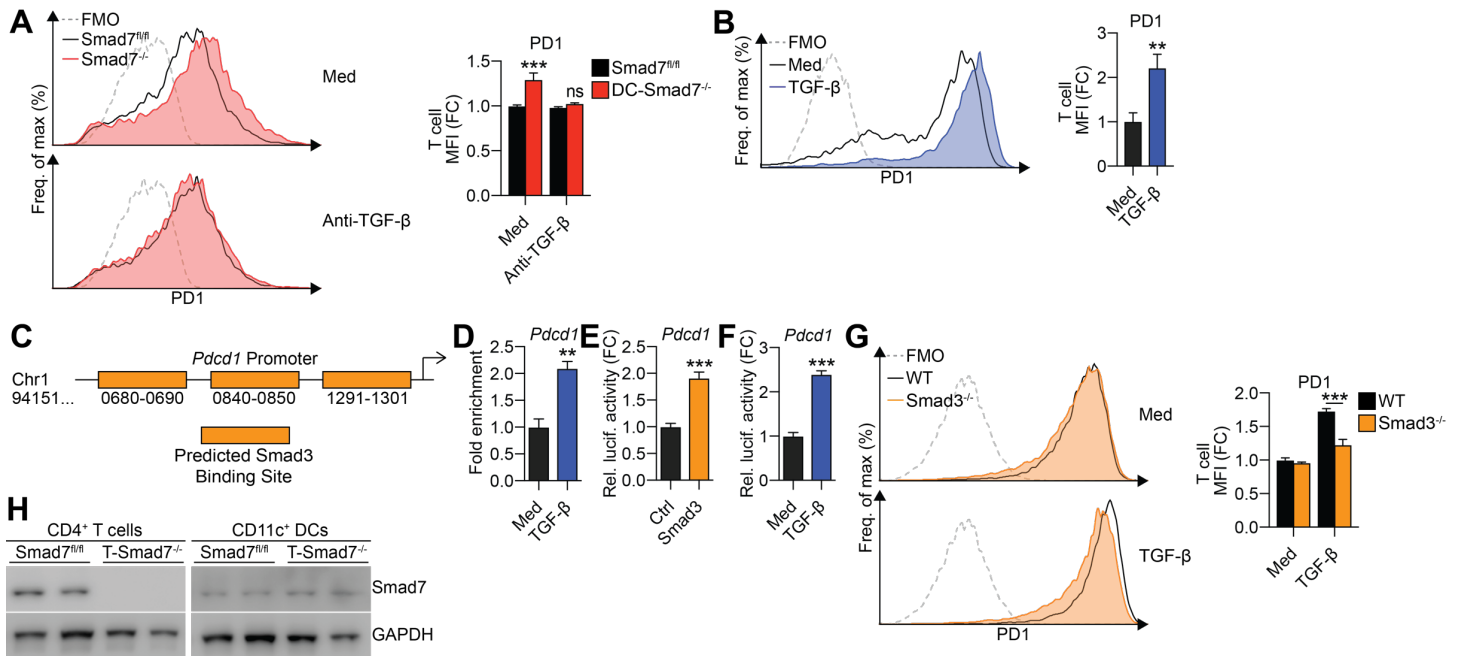

**Figure S4. Smad3 promotes CD4<sup>+</sup> T cell responsiveness to TGF- $\beta$  and ability to upregulate PD1. Related to Figure 4.** (A) Representative FACS histograms (**left**) and frequencies (**right**) of PD1 in naïve CD4<sup>+</sup> T cells co-cultured with MLN CD11c<sup>+</sup> DCs from either Smad7<sup>fl/fl</sup> or DC-Smad7<sup>-/-</sup> mice with or without anti-TGF- $\beta$  (10 mg/mL) at a 1:3 DC:T cell ratio, for 18 h (n=6). (B) Representative FACS histograms (**left**) and MFIs (**right**) of PD1 in naïve CD4<sup>+</sup> T cells stimulated with low-dose anti-CD3 (0.5 $\mu$ g/mL) and anti-CD28 (0.5 $\mu$ g/mL) with or without TGF- $\beta$  (2.5 ng/mL) for 18 h (n=10). (C) Schematic localization of putative Smad3 binding sites on *Pdc1* (PD1) promoter region from Alggen, a web-based algorithm for TFBS predictions. (D) ChIP analysis of Smad3 binding promoter region of *Pdc1* in CD4<sup>+</sup> T cells stimulated with or without TGF- $\beta$  (10 ng/mL) (n=3). ChIP data expressed as percent fold enrichment as compared to input control. (E) Luciferase reporter activity of *Pdc1* promoter in HEK-293 cells stimulated with control or Smad3 construct or (F) with or without TGF- $\beta$  (2 ng/mL) (n=6). Luciferase activity represented as relative activity fold change from control or media condition. (G) Representative FACS histograms (**left**) and frequencies (**right**) of PD1 in naïve CD4<sup>+</sup> T cells from WT and Smad3<sup>-/-</sup> mice with or without TGF- $\beta$  (2.5 ng/mL) at a 1:3 DC:T cell ratio, for 18 h (n=6). (H) Western blot of Smad7 in splenic CD4<sup>+</sup> T cells (**left**) and CD11c<sup>+</sup> DCs (**right**) isolated *ex vivo* from naïve Smad7<sup>fl/fl</sup> and T-Smad7<sup>-/-</sup> mice. Data representative of  $\geq 3$  independent experiments. MFI data reflective of CD4<sup>+</sup> population and expressed as FC from (A) Smad7<sup>fl/fl</sup> media condition, (B) media condition, or (G) WT media condition. Mean  $\pm$  SEM. ns, \*\*p<.01, \*\*\*p<.001 by unpaired T test.

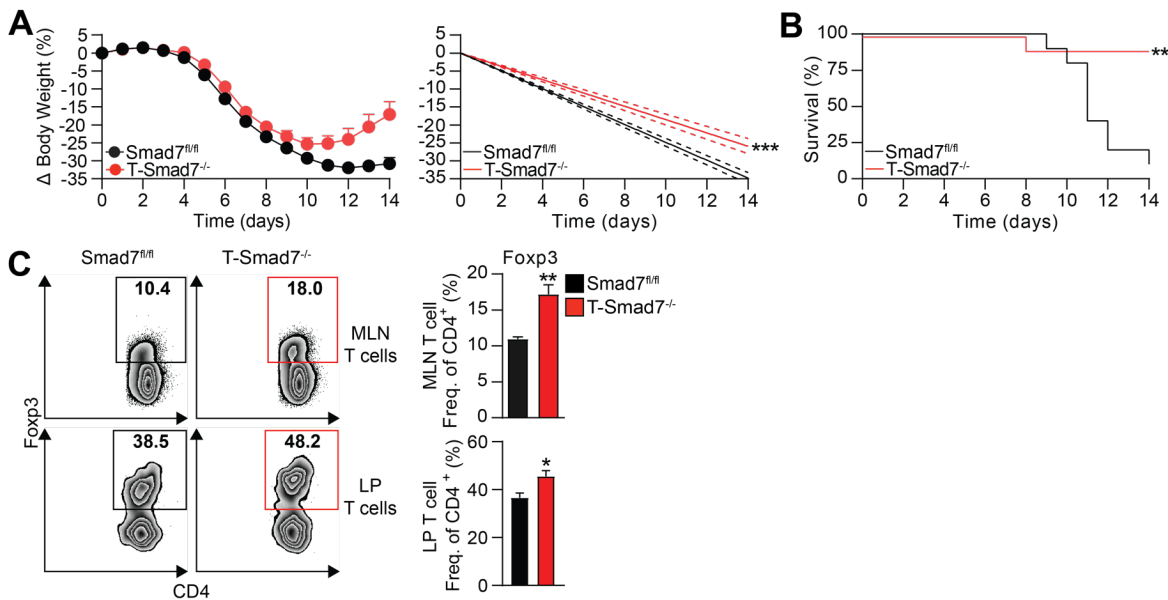

**Figure S5. Smad7 deficiency in T cells protects against DSS-induced colitis. Related to Figure 4.** (A) Percent body weight changes (left) and linear regression analysis (right) of Smad7<sup>fl/fl</sup> and T-Smad7<sup>-/-</sup> mice treated with 3% DSS in drinking water for 7 d, followed by untreated water for 7 d (n=10). The lowest final body weight score for mice that did not survive treatment was recorded for subsequent days until cessation of monitoring. (B) Survival rate of these colitis mice. (C) Representative FACS plots (left) and frequencies (right) of Foxp3<sup>+</sup> populations in MLN (top) and LP (bottom) CD4<sup>+</sup> T cells in these mice after 7 days of DSS (n=5). Data representative of  $\geq 3$  independent experiments. Mean  $\pm$  SEM. \*p<.05, \*\*p<.01, by unpaired T test.
